# Supplementary material for: NADPH Oxidase Subunit CYBB Confers Chemotherapy and Ferroptosis Resistance in Mesenchymal Glioblastoma via Nrf2/SOD2 Modulation
Source: MDPI journal article supplement (doi:10.3390/ijms24097706), 2023-04-22
Supplement: s1 [file s1]

## Supplementary Figures

### **NADPH Oxidase Subunit CYBB Confers Chemoresistance and Ferroptosis Vulnerability in Mesenchymal Glioblastoma via Nrf2/SOD2 Modulation**

I-Chang Su<sup>1,2,3,4,†</sup>, Yu-Kai Su<sup>1,2,3,4,†</sup>, Syahrul Agung Setiawan<sup>5,6</sup>, Vijesh Kumar Yadav<sup>6</sup>, Iat-Hang Fong<sup>1,2,3,4</sup>, Chi-Tai Yeh<sup>6,7</sup>, Chien-Min Lin<sup>1,2,3,4\*</sup>, Heng-Wei Liu<sup>1,2,3,4\*</sup>

1 Graduate Institute of Clinical Medicine, College of Medicine, Taipei Medical University, Taipei City 11031, Taiwan.

2 Department of Neurology, School of Medicine, College of Medicine, Taipei Medical University, Taipei City 11031, Taiwan.

3 Division of Neurosurgery, Department of Surgery, Taipei Medical University-Shuang Ho Hospital, New Taipei City 23561, Taiwan.

4 Taipei Neuroscience Institute, Taipei Medical University, Taipei 11031, Taiwan.

5 International Ph.D. Program in Medicine, College of Medicine, Taipei Medical University, Taipei City 11031, Taiwan

6 Department of Medical Research & Education, Taipei Medical University-Shuang Ho Hospital, New Taipei City 23561, Taiwan

7 Continuing Education Program of Food Biotechnology Applications, College of Science and Engineering, National Taitung University, Taitung 95092, Taiwan

† These authors contributed equally to this work.

\*Authors to whom correspondence should be addressed.

Dr. Heng-Wei Liu, PhD., Department of Medical Research and Education, Taipei Medical University - Shuang Ho Hospital, New Taipei City 23561, Taiwan. E-mail: henryway0404@hotmail.com

Prof. Chien-Min Lin MD., PhD, Division of Neurosurgery, Department of Surgery, Taipei Medical University-Shuang Ho Hospital, New Taipei City 23561, Taiwan. E-mail: m513092004@tmu.edu.tw

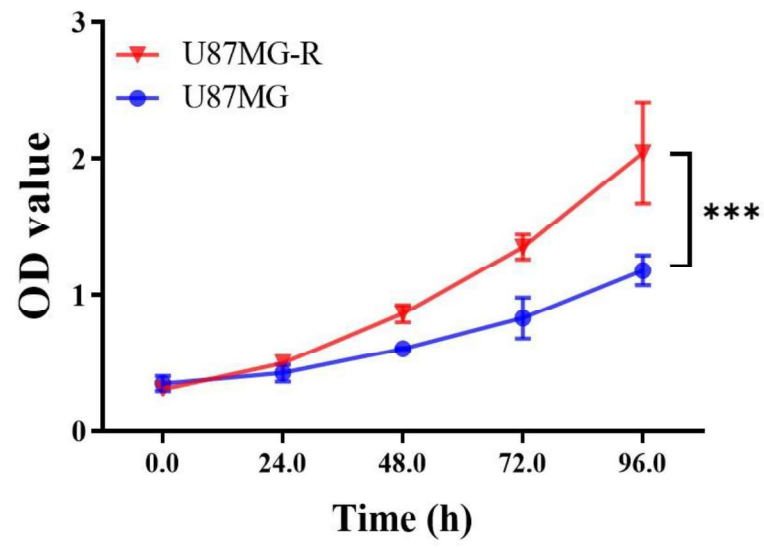

**Figure S1.** Increased cellular proliferation rate in U87MG-R than parental U87MG cells. Significance level: \*\*\*  $p < 0.001$ .

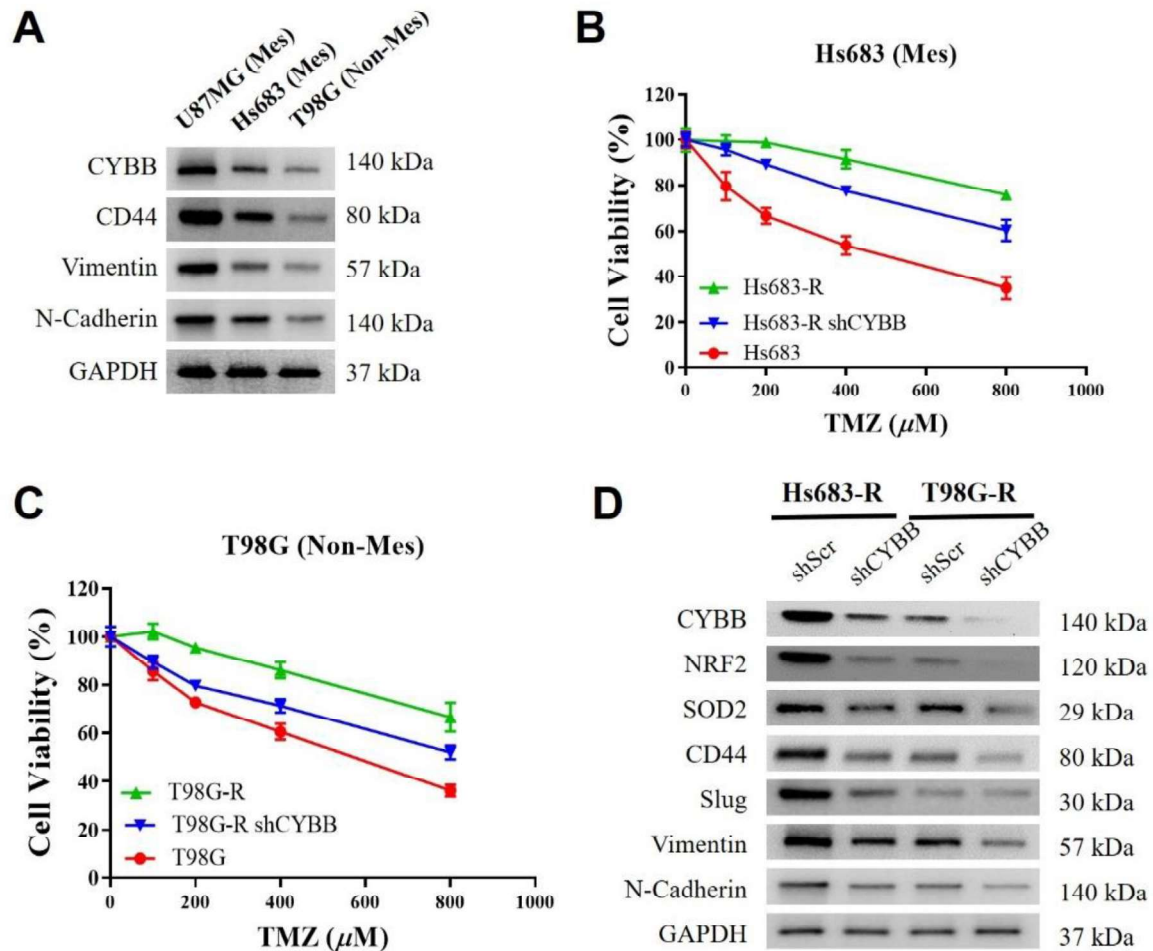

**Figure S2.** Role of CYBB in mesenchymal and non-mesenchymal GBM cell lines in the acquisition of TMZ resistance. (A) Western blotting indicated differential expression of CYBB and mesenchymal activation according markers (CD44, Vimentin, N-Cadherin) between presumed mesenchymal cells (U87MG, Hs683) and non-mesenchymal (T98G) GBM cells. The drug response curve showed relative differential sensitivity of TMZ treatment upon CYBB silencing in two chemoresistant GBM cell lines: Hs683 (B) and T98G (C). (D) Western blotting portrayed perturbation of NRF2/SOD2 axis activation and mesenchymal markers (CD44, Slug, Vimentin, N-Cadherin) between presumed Hs683-R and T98G-R chemoresistant GBM cells.
